# Supplementary material for: Development and Validation of a Personalized, Web-Based Decision Aid for Lung Cancer Screening Using Mixed Methods: A Study Protocol
Source: PubMed Central journal article supplement (PMC4376198; doi:10.2196/resprot.4039), 2014-12-19

**Values clarification exercise:** What are the pros and cons of lung cancer screening

**YES:** Getting screened for lung cancer. I think the **PROS** of screening are:

1. \_\_\_\_\_  
\_\_\_\_\_

On a scale of 1 to 10, how important is this reason to you? Please click on a number that applies.

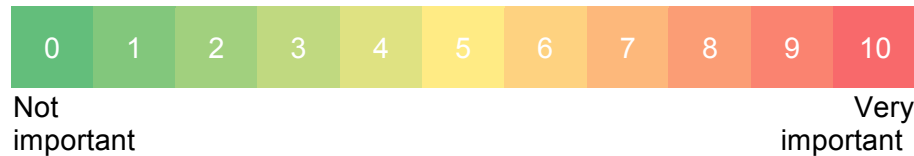

2. \_\_\_\_\_  
\_\_\_\_\_

On a scale of 1 to 10, how important is this reason to you? Please click on a number that applies.

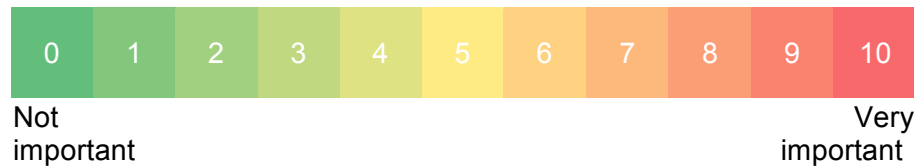

**NO:** Not getting screened for lung cancer. I think the **CONS** of screening are:

1. \_\_\_\_\_  
\_\_\_\_\_

On a scale of 1 to 10, how important is this reason to you? Please click on a number that applies.

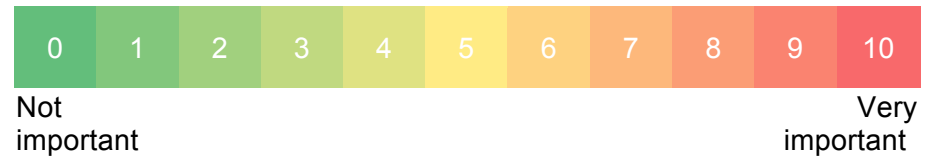

2. \_\_\_\_\_  
\_\_\_\_\_

On a scale of 1 to 10, how important is this reason to you? Please click on a number that applies.

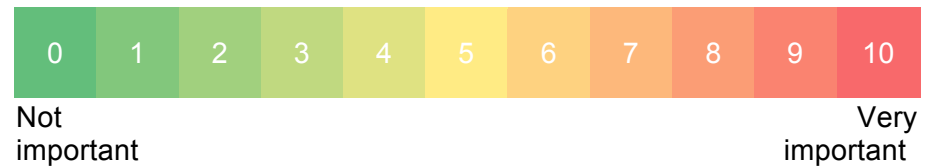

Supplement: resprot_v3i4e78_app9.pdf [file resprot_v3i4e78_app9.pdf]
